# Supplementary material for: Prophylactic Glatiramer Acetate Treatment Positively Attenuates Spontaneous Opticospinal Encephalomyelitis
Source: MDPI journal article supplement (doi:10.3390/cells12040542), 2023-02-08
Supplement: s1 [file s1]

## **SUPPLEMENT**

### **Prophylactic Glatiramer Acetate Treatment positively attenuates Spontaneous Opticospinal Encephalomyelitis**

Ümmügülsüm Koc <sup>1</sup>, Steffen Haupeltshofer <sup>1</sup>, Katharina Klöster <sup>1</sup>, Seray Demir <sup>1</sup>, Ralf Gold <sup>1</sup>,  
Simon Faissner <sup>1</sup>

1 Department of Neurology, Ruhr-University Bochum, St. Josef-Hospital, Gudrunstr. 56,  
44791 Bochum, Germany

#### **Corresponding author**

Simon Faissner, MD

Assistant Professor

Department of Neurology

St. Josef-Hospital, Ruhr-University Bochum

Gudrunstr. 56, 44791 Bochum, Germany

Tel: +49-234-5092411; Fax: +49-234-5092414

Email: [simon.faissner@rub.de](mailto:simon.faissner@rub.de)

## SUPPLEMENTARY TABLES

**Table S1:** Fluorescent-labeled antibodies against cell surface proteins used for flow cytometry for cell surface protein detection.

| Target     | Label | Dilution | Company                 |
|------------|-------|----------|-------------------------|
| CD4        | APC   | 1:200    | eBioscience 17-0042-82  |
| CD8        | FITC  | 1:200    | BioLegend 100705        |
| CD11b      | FITC  | 1:200    | BD Pharmingen 553310    |
| CD11c      | APC   | 1:200    | eBioscience 17-0114-81  |
| CD19       | FITC  | 1:200    | BD Pharmingen 553785    |
| CD25       | APC   | 1:200    | eBioscience 17-0251-81A |
| CD45R/B220 | APC   | 1:200    | BD Biosciences 553086   |
| CD69       | PE    | 1:200    | eBioscience 12-0691-81  |
| MHCII      | PE    | 1:200    | BioLegend 107607        |

**Table S2:** Fluorescent-labeled antibodies against intracellular proteins.

| Target        | Label | Dilution | Company                |
|---------------|-------|----------|------------------------|
| Fox P3        | PE    | 1:200    | eBioscience 12-5773-82 |
| IL-17A        | PE    | 1:200    | BD Pharmingen 559502   |
| IFN- $\gamma$ | FITC  | 1:200    | eBioscience 11-7311-81 |

**Table S3:** Primary and secondary anti-mouse antibodies for immunofluorescent analysis.

| First Antibody                                       | Second Antibody                                          |
|------------------------------------------------------|----------------------------------------------------------|
| Anti-Iba1, polyclonal rabbit (1:500; Wako 019-18741) | Cy5 Anti-rabbit (1:1000; Abcam ab97077)                  |
| Anti-F4/80, monoclonal rat (1:300; BioRad MCA497GA)  | Alexa 488 Anti-rat (1:1000; Thermo Scientific A10525)    |
| Anti-CD11c Armenian Hamster (1:200; Abcam ab33483)   | Alexa 488 Anti-Armenian Hamster (1:1000; Abcam ab173003) |
